# Supplementary material for: Dynamic de novo heterochromatin assembly and disassembly at replication forks ensures fork stability
Source: Springer Nature journal article supplement (doi:10.1038/s41556-023-01167-z), 2023-07-01

Unprocessed western blots associated with **Extended data fig. 1c**

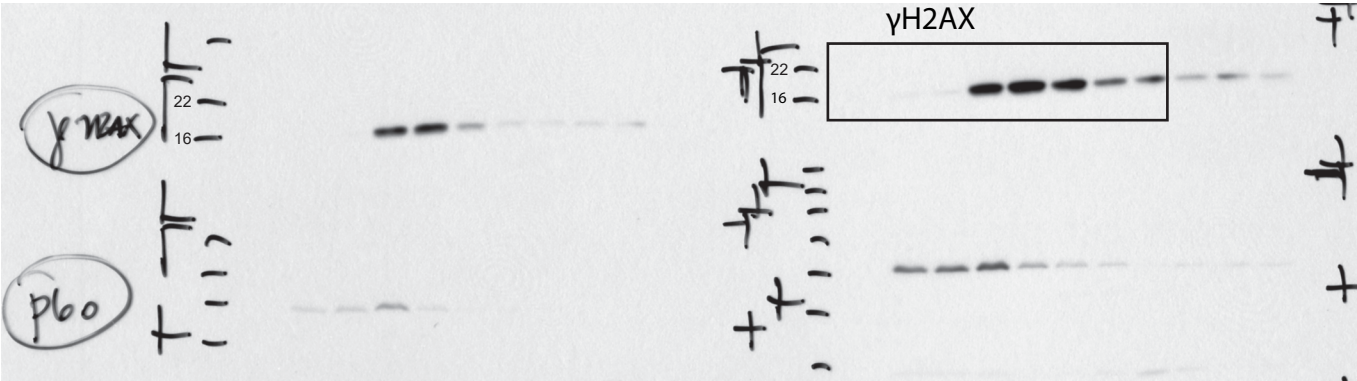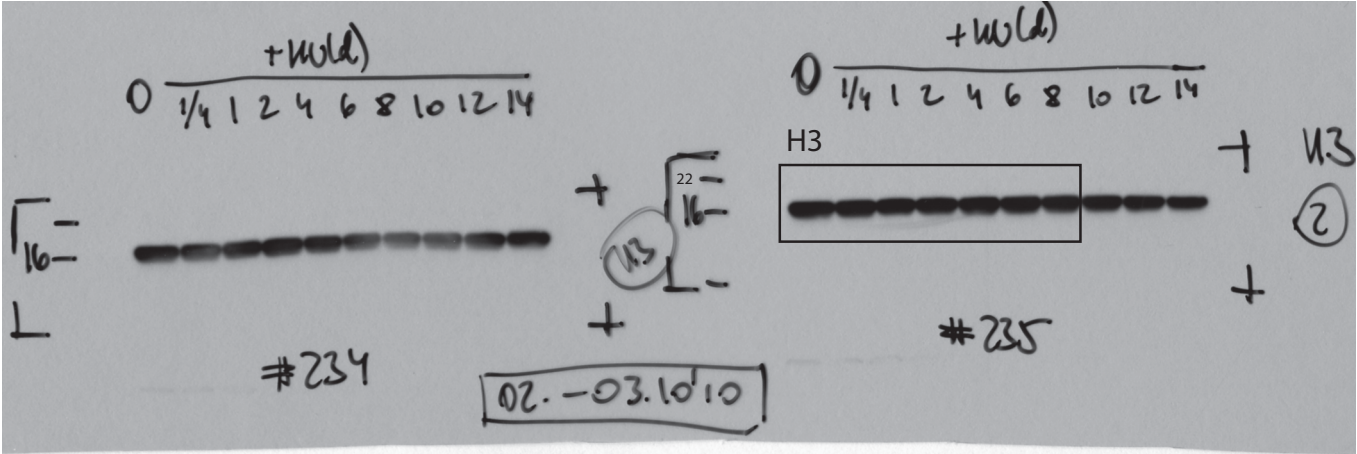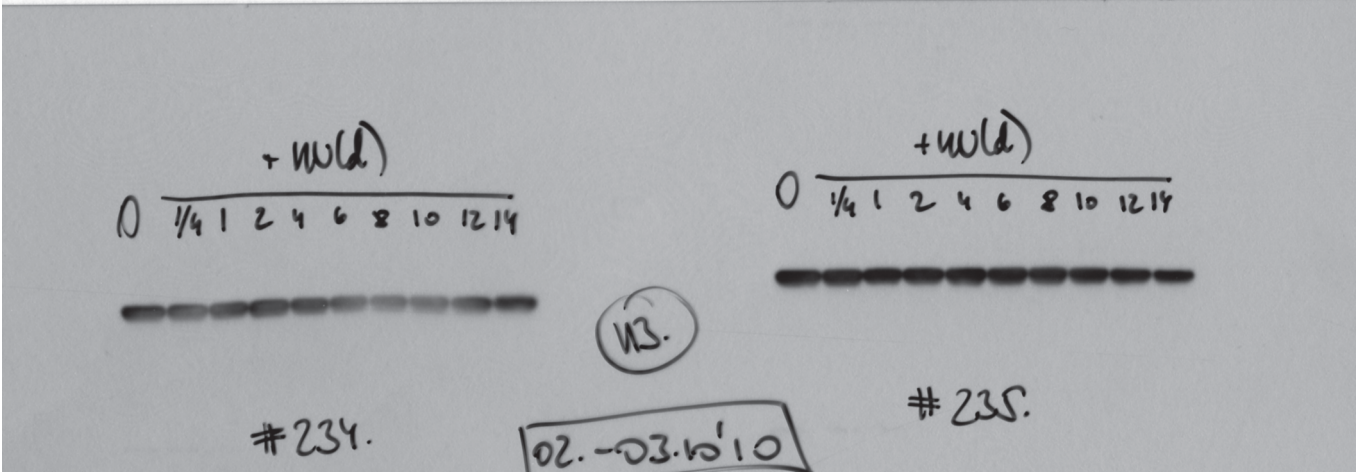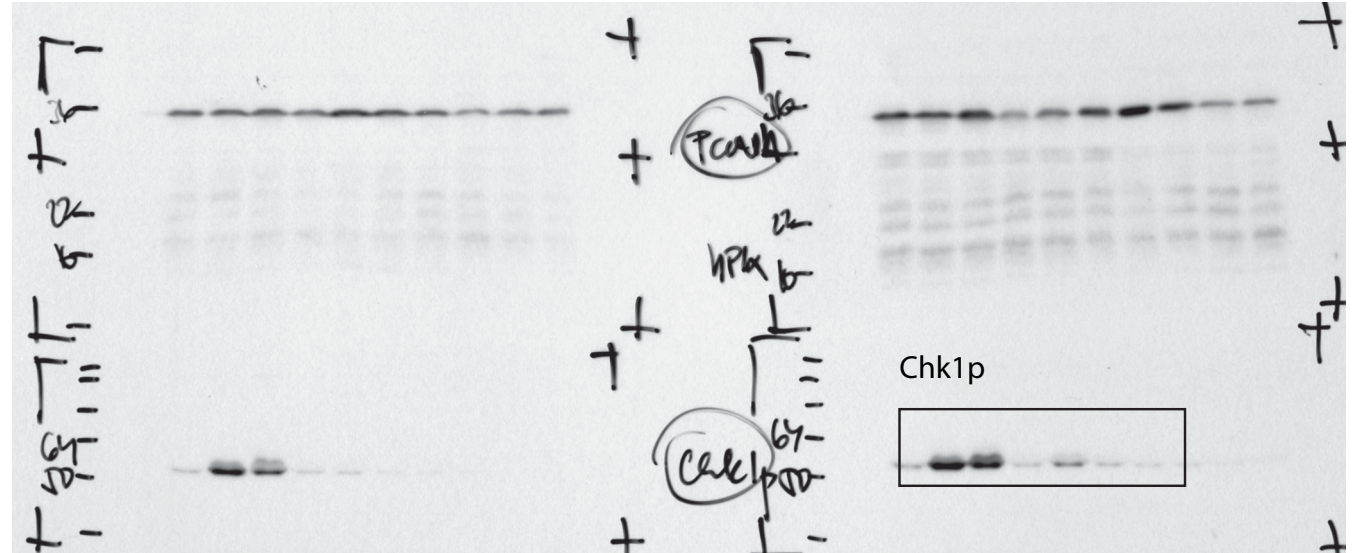



Unprocessed western blots associated with **Extended data fig. 1c**

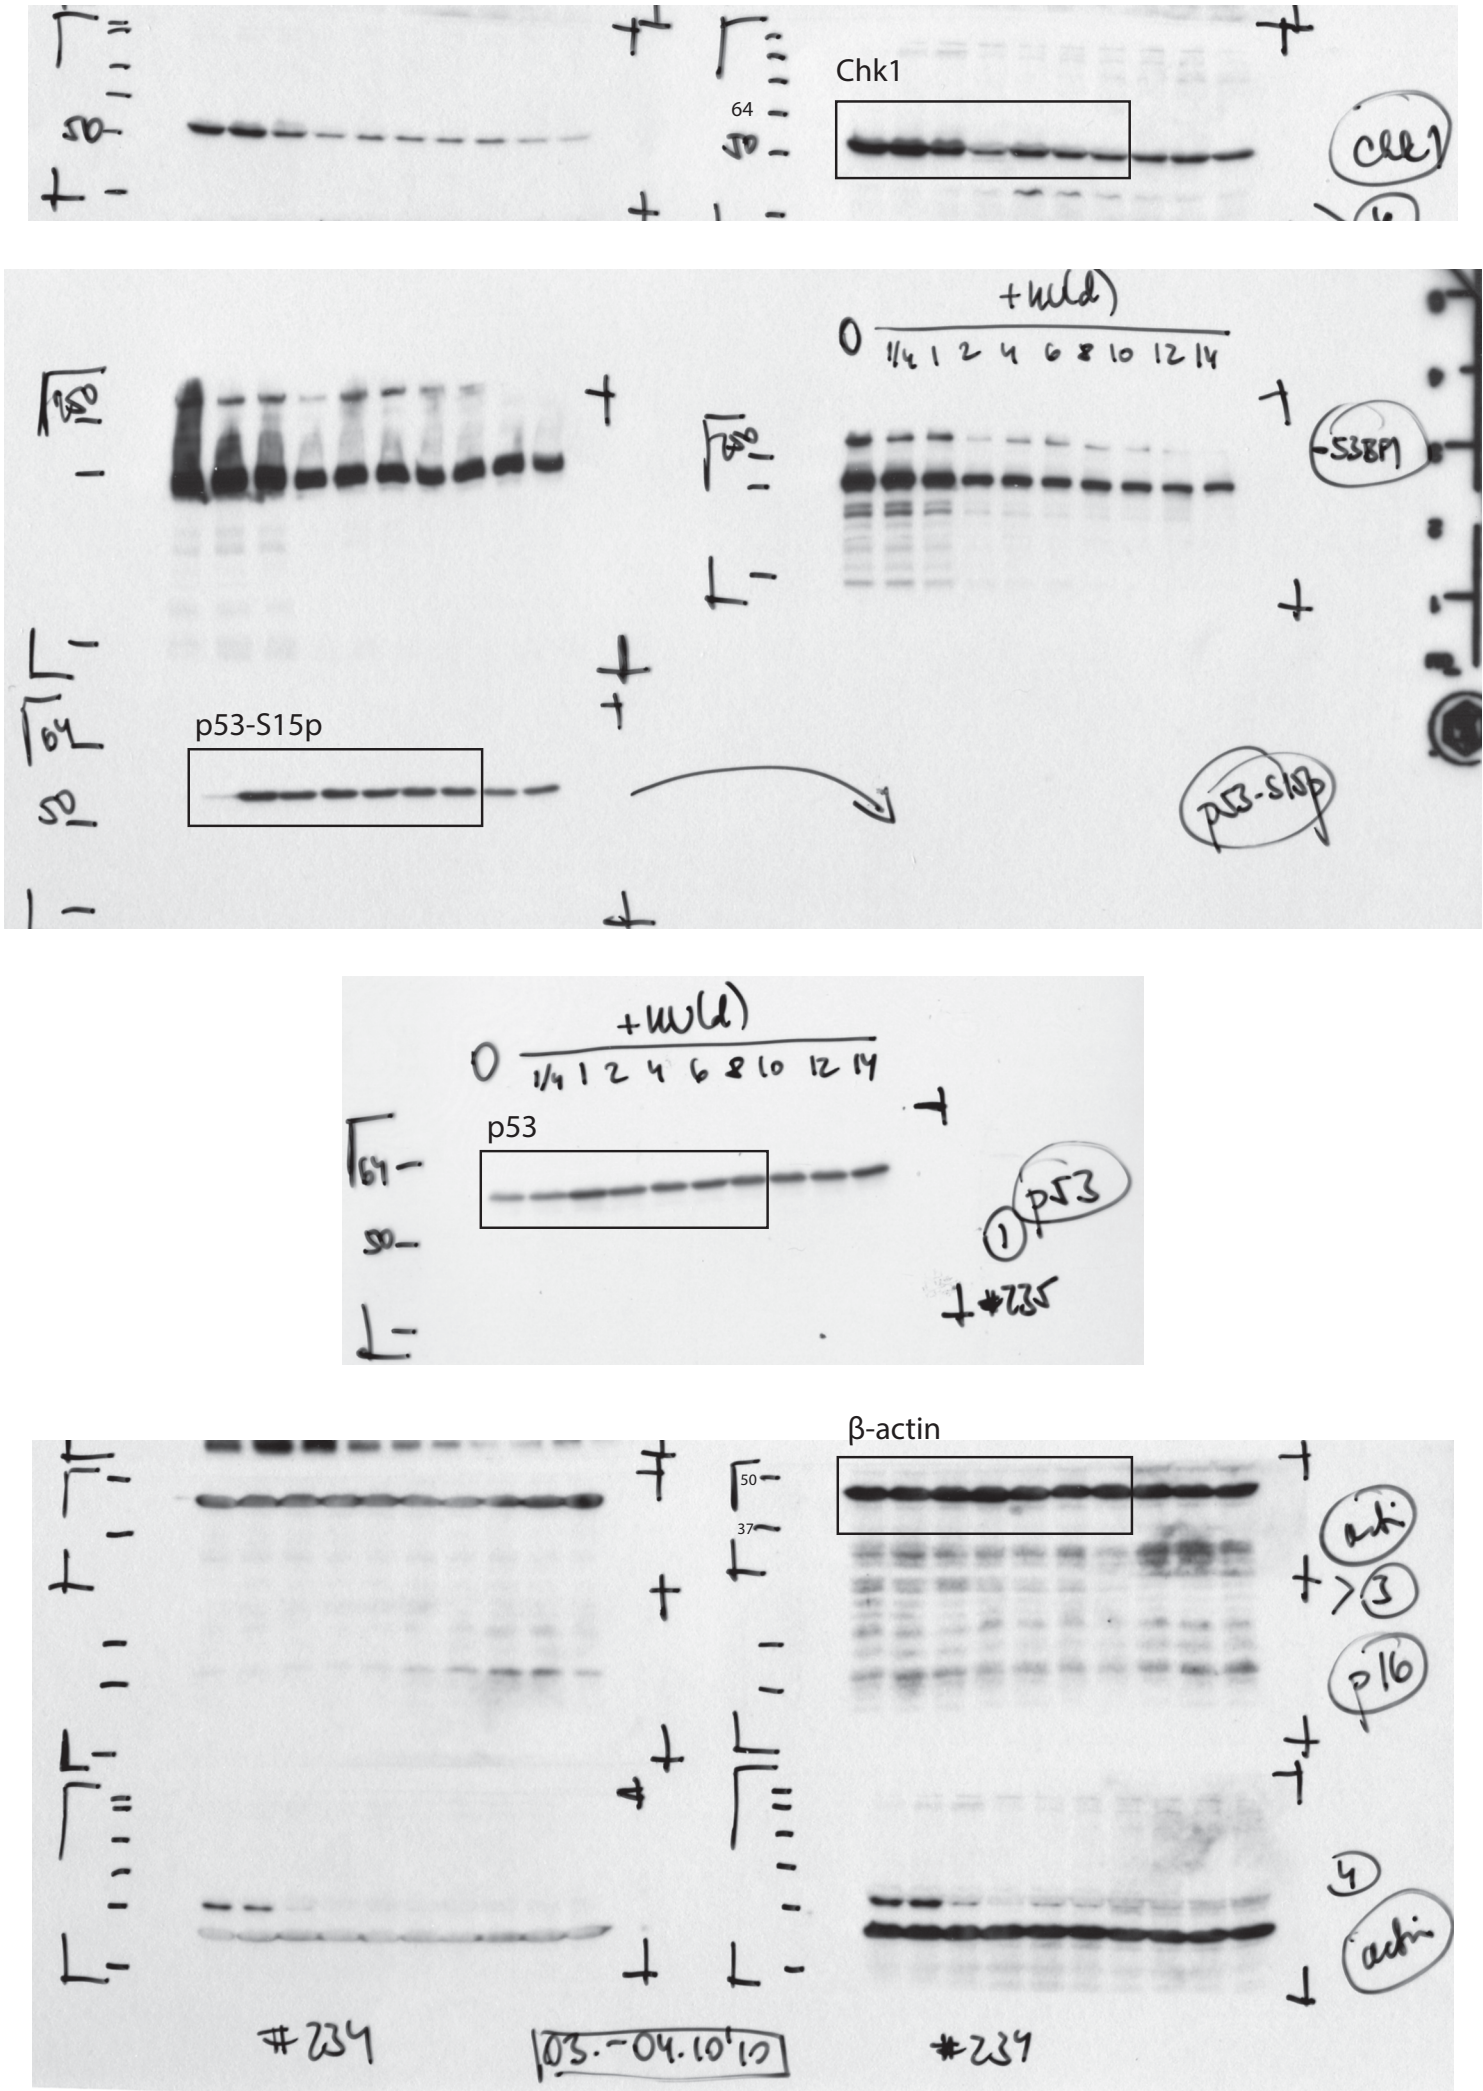

Supplement: MOESM14 [file 41556_2023_1167_MOESM14_ESM.pdf]
